# Supplementary material for: A Single Point Mutation in the Mumps V Protein Alters Targeting of the Cellular STAT Pathways Resulting in Virus Attenuation
Source: MDPI journal article supplement (doi:10.3390/v11111016), 2019-11-01
Supplement: s1 [file s1]

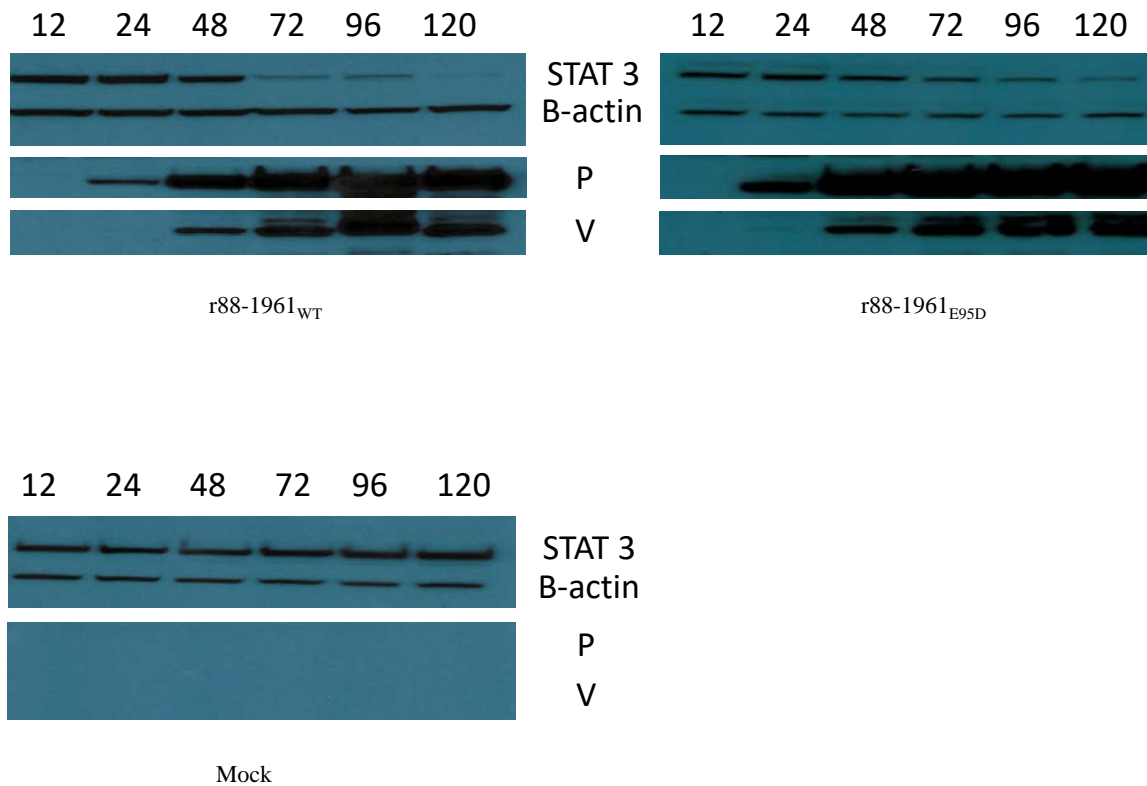

**Supplemental Figure 1.** Degradation of STAT 3 in FADU Cells. Confluent monolayers of FADU cells were infected with r88-1961<sub>WT</sub> and r88-1961<sub>E95D</sub> at an MOI of 1.0. Cell lysates prepared at the times indicated were subjected to SDS-PAGE and Western blot. The blots were probed with anti-STAT3, anti-B-actin, and anti-mumps P/V antibodies. Degradation of STAT3 was noticeably delayed in cells infected with r88-1961<sub>E95D</sub> versus those infected with r88-1961<sub>WT</sub>. Reduced V<sub>E95D</sub> activity corresponded with a concomitant increase in V<sub>E95D</sub> versus V<sub>WT</sub> expression.
